# Supplementary material for: Cognitive and Developmental Functions in Autistic and Non-Autistic Children and Adolescents: Evidence from the Intelligence and Development Scales–2
Source: MDPI journal article supplement (doi:10.3390/jintelligence10040112), 2022-11-21
Supplement: s1 [file s1]

# Supplementary Material to “Cognitive and Developmental Functions in Autistic and Non-Autistic Children and Adolescents: Evidence from the Intelligence and Development Scales–2”

**Table S1**

*Description of the Composites, Group Factors, and Subtests of the Intelligence and Development Scales–2*

| Composite                                 | Group factor                          | Subtest/Task                       | No. of items/subtests | Description                                                                                                               | Measurement of                                         |
|-------------------------------------------|---------------------------------------|------------------------------------|-----------------------|---------------------------------------------------------------------------------------------------------------------------|--------------------------------------------------------|
| Profile IQ (PrIQ)                         |                                       |                                    | 14                    | Including the subtests SD, WD, PSP, PSB, DLS, MDLS, SM, RSM, MC, MOO, NC, NO, SR, PR                                      |                                                        |
| Full-Scale IQ (FSIQ)                      |                                       |                                    | 7                     | Including one subtest from every group factor (i.e., SD, PSP, DLS, SM, MC, NC, SR)                                        |                                                        |
| Screening IQ (ScrIQ)                      |                                       |                                    | 2                     | Including one subtest from the group factor AR (i.e., MC) and one subtest from the group factor VR (i.e., NC)             |                                                        |
|                                           | Visual Processing (VP)                | Shape Design (SD)                  | 20                    | Reproduce geometric figures with the help of rectangles and triangles                                                     | Visual processing                                      |
|                                           |                                       | Washer Design (WD)                 | 2–4 <sup>a</sup>      | Reproduce counter patterns according to a template                                                                        | Visual processing                                      |
|                                           | Processing Speed (PS)                 | Parrots (PSP)                      | 56–180 <sup>a</sup>   | Cross out parrots with two orange features that look to the left from rows of different parrots                           | Processing speed                                       |
|                                           |                                       | Boxes (PSB)                        | 104–180 <sup>a</sup>  | Cross out groups of three or four boxes from rows of different groups of boxes                                            | Processing speed                                       |
|                                           | Auditory Short-Term Memory (ASTM)     | Digit and Letter Span (DLS)        | 40                    | Repeat number and letter sequences forward and backward                                                                   | Forward: Short-term memory<br>Backward: Working memory |
|                                           |                                       | Mixed Digit and Letter Span (MDLS) | 36                    | Repeat mixed number and letter sequences forward and backward                                                             | Forward: Short-term memory<br>Backward: Working memory |
|                                           | Visuospatial Short-Term Memory (VSTM) | Shape Memory (SM)                  | 23                    | Remember figures and recognize them from a selection of figures and positions                                             | Short-term memory                                      |
|                                           |                                       | Rotated Shape Memory (RSM)         | 23                    | Remember figures and recognize them from a selection of rotated figures and positions                                     | Working memory                                         |
|                                           | Abstract Reasoning (AR)               | Matrices: Completion (MC)          | 35                    | Understand how a figure changes and transfer these changes to a continuing figure                                         | Fluid reasoning                                        |
|                                           |                                       | Matrices: Odd One Out (MOO)        | 31                    | Select from presented pictures the one that does not fit with the others                                                  | Fluid reasoning                                        |
|                                           | Verbal Reasoning (VR)                 | Naming Categories (NC)             | 34                    | Name categories for a group of pictures or words                                                                          | Comprehension-knowledge                                |
|                                           |                                       | Naming Opposites (NO)              | 34                    | Name opposites of presented words                                                                                         | Comprehension-knowledge                                |
|                                           | Long-Term Memory (LTM)                | Story Recall (SR)                  | 19–32 <sup>a</sup>    | Listen to a semantically meaningful story and recall it after at least 20 min                                             | Long-term memory                                       |
|                                           |                                       | Picture Recall (PR)                | 11–21 <sup>a</sup>    | Look at a picture and recall key features and details after at least 20 min                                               | Long-term memory                                       |
| Executive functions composite score (EFC) |                                       |                                    | 4                     | Including the subtests LW, DA, AC, DR                                                                                     |                                                        |
|                                           |                                       | Listing Words (LW)                 | 2–4 <sup>a</sup>      | List words based on categories or starting letters                                                                        | Word fluency                                           |
|                                           |                                       | Divided Attention (DA)             | 50–100 <sup>a</sup>   | Cross out parrots with two orange features that look to the left from different parrots and list animals at the same time | Cognitive flexibility                                  |
|                                           |                                       | Animal Colors (AC)                 | 3                     | Say colors of animals as fast as possible                                                                                 | Inhibition                                             |
|                                           |                                       | Drawing Routes (DR)                | 14                    | Travel given routes as fast as possible once                                                                              | Planning                                               |
| Psychomotor skills composite score (PSC)  |                                       |                                    | 3                     | Including the subtests GM, FM, VM                                                                                         |                                                        |

| Composite                                      | Group factor | Subtest/Task                                                  | No. of items/subtests | Description                                                                                                         | Measurement of                           |
|------------------------------------------------|--------------|---------------------------------------------------------------|-----------------------|---------------------------------------------------------------------------------------------------------------------|------------------------------------------|
|                                                |              | Gross Motor Skills (GM)                                       | 3                     | Balance on a rope, catch and throw a ball, and jump sideways over a rope                                            | Gross motor skills                       |
|                                                |              | Fine Motor Skills (FM)                                        | 6                     | Quickly screw nuts on and off bolts of different sizes and quickly thread beads of different sizes                  | Fine motor skills                        |
|                                                |              | Visuomotor Skills (VM)                                        | 12                    | Move exactly between lines, draw figures, and reflect figures                                                       | Visuomotor skills                        |
| Social-emotional skills composite score (SESC) |              |                                                               | 3                     | Including the subtests IE, RE, SC                                                                                   |                                          |
|                                                |              | Identifying Emotions (IE)                                     | 10                    | Recognize and name emotions of children in photos                                                                   | Emotion recognition                      |
|                                                |              | Regulating Emotions (RE)                                      | 6-9 <sup>a</sup>      | Specify regulation strategies for the emotions of anger, fear, and grief                                            | Emotion regulation                       |
|                                                |              | Socially Competent Behavior (SC)                              | 6-9 <sup>a</sup>      | Name socially competent behavior according to a presented social situation                                          | Socially competent behavior              |
| Basic skills composite score (BSC)             |              |                                                               | 4                     | Including the subtests MR, LS, RD, SP                                                                               |                                          |
|                                                |              | Logical-Mathematical Reasoning (MR)                           | 64                    | Solve logical-mathematical reasoning tasks                                                                          | Mathematical skills                      |
|                                                |              | Language Skills (LS)                                          | 4                     | Including the tasks PA, PGC, LE, LR                                                                                 | Language skills                          |
|                                                |              | Phoneme Analysis (PA)                                         | 56                    | Clap syllables, recognize rhymes, isolate on and off sounds, sound out words                                        | Phonological awareness                   |
|                                                |              | Phoneme–Grapheme Correspondence (PGC)                         | 42                    | Match phonemes and graphemes, recognize short and long vowels                                                       | Knowledge of letter–sound correspondence |
|                                                |              | Language Expressive (LE)                                      | 12                    | Form sentences from several words                                                                                   | Language production                      |
|                                                |              | Language Receptive (LR)                                       | 15                    | Carry out instructions                                                                                              | Language comprehension                   |
|                                                |              | Reading (RD)                                                  | 3                     | Including RW, RP, TC                                                                                                | Reading                                  |
|                                                |              | Reading Words (RW)                                            | 60                    | Read real words                                                                                                     | Word recognition                         |
|                                                |              | Reading Pseudo Words (RP)                                     | 60                    | Read pseudo words                                                                                                   | Synthetic reading                        |
|                                                |              | Text Comprehension (TC)                                       | 14-19 <sup>a</sup>    | Read and understand texts                                                                                           | Reading comprehension                    |
|                                                |              | Spelling (SP)                                                 | 40-60 <sup>a</sup>    | Word dictation                                                                                                      | Spelling skills                          |
| Motivation and attitude composite score (MAC)  |              |                                                               | 2                     | Including the subtests CS, AM                                                                                       |                                          |
|                                                |              | Conscientiousness (CS)                                        | 18                    | Rate statements regarding conscientiousness                                                                         | Conscientiousness                        |
|                                                |              | Achievement Motivation (AM)                                   | 18                    | Rate statements regarding achievement motivation                                                                    | Achievement motivation                   |
|                                                |              | Participation during testing, intelligence (PDTIQ)            | 12                    | The test administrator evaluates the participant's cooperation during testing of the intelligence domain            | Achievement motivation                   |
|                                                |              | Participation during testing, executive functions (PDTEF)     | 12                    | The test administrator evaluates the participant's cooperation during testing of the executive functions domain     | Achievement motivation                   |
|                                                |              | Participation during testing, developmental functions (PDTDF) | 12                    | The test administrator evaluates the participant's cooperation during testing of the developmental functions domain | Achievement motivation                   |

*Note.* Gross Motor Skills, Identifying Emotions, and Language Skills only for ages 5 to 10 years; Reading and Spelling only for ages 7 to 20 years; Conscientiousness and Achievement Motivation only for ages 11 to 20 years.

<sup>a</sup> Depending on age and skill.

**Table S2**

*Means, Standard Deviations, and t tests of the Developmental Functions From the Intelligence and Development Scales–2 for Autistic and Non-Autistic Children and Adolescents Matched by Age, Sex, and Intelligence*

| Variable                                | Autistic sample<br><i>n</i> = 43 |           |       | Non-autistic sample<br><i>n</i> = 43 |           |       | <i>t</i> | <i>df</i> | <i>p</i> | <i>p<sub>H</sub></i> | <i>d</i>    |
|-----------------------------------------|----------------------------------|-----------|-------|--------------------------------------|-----------|-------|----------|-----------|----------|----------------------|-------------|
|                                         | <i>M</i>                         | <i>SD</i> | Range | <i>M</i>                             | <i>SD</i> | Range |          |           |          |                      |             |
| Psychomotor skills composite score      | 8.49                             | 2.22      | 4–12  | 10.15                                | 2.03      | 6–15  | 3.58     | 82        | < .001   | <b>.007</b>          | <b>0.78</b> |
| Gross Motor Skills                      | 5.29                             | 3.57      | 1–11  | 10.31                                | 3.09      | 4–17  | 4.31     | 31        | < .001   | <b>.002</b>          | <b>1.50</b> |
| Fine Motor Skills                       | 8.65                             | 3.03      | 2–14  | 10.19                                | 2.81      | 2–17  | 2.41     | 81        | .009     | .166                 | 0.53        |
| Visuomotor Skills                       | 8.79                             | 1.97      | 4–13  | 10.16                                | 1.81      | 7–15  | 3.29     | 80        | < .001   | <b>.018</b>          | <b>0.73</b> |
| Social-emotional skills composite score | 8.32                             | 2.86      | 1–13  | 9.70                                 | 2.19      | 4–15  | 2.50     | 83        | .007     | .135                 | 0.54        |
| Identifying Emotions                    | 7.71                             | 4.27      | 1–12  | 9.41                                 | 3.18      | 1–12  | 1.32     | 32        | .098     | .884                 | 0.45        |
| Regulating Emotions                     | 8.40                             | 3.39      | 1–13  | 9.35                                 | 3.01      | 1–15  | 1.36     | 83        | .089     | .884                 | 0.30        |
| Socially Competent Behavior             | 8.32                             | 3.17      | 1–15  | 9.98                                 | 2.92      | 6–18  | 2.45     | 80        | .008     | .155                 | 0.54        |
| Basic skills composite score            | 9.77                             | 2.53      | 2–14  | 9.01                                 | 3.09      | 1–13  | -1.15    | 75        | .254     | .999                 | 0.26        |
| Logical-Mathematical Reasoning          | 9.07                             | 4.21      | 1–17  | 9.63                                 | 3.86      | 1–15  | 0.63     | 82        | .531     | .999                 | 0.14        |
| Language Skills                         | 7.12                             | 2.65      | 3–14  | 9.01                                 | 3.44      | 2–14  | 1.65     | 28        | .055     | .662                 | 0.61        |
| Phoneme Analysis                        | 6.07                             | 3.00      | 1–13  | 9.18                                 | 4.05      | 1–16  | 2.38     | 29        | .012     | .218                 | 0.86        |
| Phoneme–Grapheme Correspondence         | 9.07                             | 4.20      | 1–15  | 9.41                                 | 4.05      | 1–17  | 0.23     | 29        | .410     | .999                 | 0.08        |
| Language Expressive                     | 7.08                             | 2.96      | 1–14  | 9.47                                 | 4.85      | 1–16  | 1.57     | 28        | .064     | .762                 | 0.58        |
| Language Receptive                      | 6.71                             | 3.34      | 2–14  | 8.00                                 | 3.76      | 1–14  | 1.00     | 29        | .164     | .999                 | 0.36        |
| Reading                                 | 8.76                             | 3.33      | 1–15  | 8.76                                 | 2.95      | 1–14  | 0.00     | 71        | .999     | .999                 | 0.00        |
| Reading Words                           | 9.34                             | 3.41      | 2–16  | 8.46                                 | 3.00      | 1–14  | -1.19    | 73        | .238     | .999                 | 0.27        |
| Reading Pseudo Words                    | 8.89                             | 2.89      | 2–14  | 8.89                                 | 3.06      | 1–16  | 0.00     | 72        | .999     | .999                 | 0.00        |
| Text Comprehension                      | 9.40                             | 5.02      | 1–16  | 10.21                                | 3.62      | 2–16  | 0.72     | 62        | .236     | .999                 | 0.18        |
| Spelling                                | 8.89                             | 3.19      | 3–15  | 8.29                                 | 3.76      | 1–14  | -0.67    | 60        | .507     | .999                 | 0.17        |
| Motivation and attitude composite score | 10.56                            | 3.24      | 6–17  | 10.20                                | 2.57      | 5–19  | -0.45    | 51        | .674     | .999                 | 0.13        |
| Conscientiousness                       | 10.21                            | 3.27      | 6–18  | 10.25                                | 2.49      | 6–19  | 0.05     | 50        | .479     | .999                 | 0.01        |

| Variable                                              | Autistic sample<br><i>n</i> = 43 |           |       | Non-autistic sample<br><i>n</i> = 43 |           |       | <i>t</i> | <i>df</i> | <i>p</i> | <i>p<sub>H</sub></i> | <i>d</i> |
|-------------------------------------------------------|----------------------------------|-----------|-------|--------------------------------------|-----------|-------|----------|-----------|----------|----------------------|----------|
|                                                       | <i>M</i>                         | <i>SD</i> | Range | <i>M</i>                             | <i>SD</i> | Range |          |           |          |                      |          |
| Achievement Motivation                                | 11.12                            | 3.96      | 4–19  | 10.14                                | 3.25      | 1–19  | -0.99    | 52        | .836     | .999                 | 0.27     |
| Participation during testing, intelligence            | 8.19                             | 3.15      | 1–16  | 9.74                                 | 3.05      | 2–16  | 2.31     | 83        | .012     | .210                 | 0.50     |
| Participation during testing, executive functions     | 8.76                             | 2.75      | 1–16  | 9.53                                 | 2.83      | 2–15  | 1.21     | 75        | .116     | .955                 | 0.28     |
| Participation during testing, developmental functions | 8.33                             | 3.31      | 1–16  | 9.85                                 | 3.08      | 3–17  | 2.14     | 80        | .018     | .315                 | 0.47     |

*Note.* Samples were matched for age, sex, and intelligence (Full-Scale IQ). *p<sub>H</sub>* indicates *p* values adjusted with Hommel's (1988) correction. Significant results after accounting for multiple testing (Hommel correction) are presented in bold.

**Table S3**

*Means, Standard Deviations, and t tests of the Cognitive Functions From the Intelligence and Development Scales–2 for Autistic and Non-Autistic Children (Aged 5-10 Years)*

| Variable                                    | Autistic children<br><i>n</i> = 17 |           |        | Non-autistic children<br><i>n</i> = 17 |           |        | <i>t</i> | <i>df</i> | <i>p</i> | <i>p<sub>H</sub></i> | <i>d</i>    |
|---------------------------------------------|------------------------------------|-----------|--------|----------------------------------------|-----------|--------|----------|-----------|----------|----------------------|-------------|
|                                             | <i>M</i>                           | <i>SD</i> | Range  | <i>M</i>                               | <i>SD</i> | Range  |          |           |          |                      |             |
| Profile IQ <sup>b</sup>                     | 77.69                              | 20.08     | 55–114 | 100.93                                 | 13.49     | 74–118 | 3.64     | 26        | < .001   | <b>.017</b>          | <b>1.38</b> |
| Full-Scale IQ <sup>b</sup>                  | 79.53                              | 20.55     | 55–119 | 99.65                                  | 14.99     | 74–120 | 3.19     | 30        | .002     | <b>.033</b>          | <b>1.13</b> |
| Screening IQ <sup>b</sup>                   | 83.12                              | 18.47     | 55–122 | 101.59                                 | 16.54     | 70–134 | 3.03     | 31        | .002     | <b>.037</b>          | <b>1.06</b> |
| Visual Processing <sup>b</sup>              | 84.21                              | 27.23     | 55–129 | 102.62                                 | 11.65     | 80–117 | 2.46     | 28        | .020     | .115                 | 0.90        |
| Processing Speed <sup>b</sup>               | 83.53                              | 20.75     | 55–131 | 101.62                                 | 19.10     | 56–125 | 2.53     | 29        | .009     | .070                 | 0.91        |
| Auditory Short-Term Memory <sup>b</sup>     | 81.15                              | 12.53     | 61–97  | 96.06                                  | 15.13     | 64–120 | 2.84     | 27        | .004     | <b>.047</b>          | <b>1.06</b> |
| Visuospatial Short-Term Memory <sup>b</sup> | 81.64                              | 15.99     | 55–105 | 99.56                                  | 11.42     | 77–117 | 3.57     | 28        | < .001   | <b>.019</b>          | <b>1.31</b> |
| Abstract Reasoning <sup>b</sup>             | 84.80                              | 21.49     | 55–141 | 98.75                                  | 13.78     | 73–119 | 2.17     | 29        | .039     | .155                 | 0.78        |
| Verbal Reasoning <sup>b</sup>               | 85.00                              | 17.74     | 61–123 | 102.75                                 | 14.01     | 78–131 | 3.10     | 29        | .002     | <b>.036</b>          | <b>1.12</b> |
| Long-Term Memory <sup>b</sup>               | 85.50                              | 16.26     | 55–107 | 97.62                                  | 13.84     | 67–125 | 2.21     | 28        | .018     | .107                 | 0.81        |
| Shape Design <sup>a</sup>                   | 7.00                               | 5.10      | 1–16   | 10.47                                  | 2.60      | 7–16   | 2.49     | 31        | .019     | .111                 | 0.87        |
| Washer Design <sup>a</sup>                  | 8.07                               | 4.67      | 1–14   | 10.75                                  | 2.70      | 7–15   | 1.98     | 29        | .058     | .231                 | 0.71        |
| Parrots <sup>a</sup>                        | 6.56                               | 4.02      | 1–16   | 9.47                                   | 3.68      | 1–15   | 2.17     | 31        | .019     | .113                 | 0.76        |
| Boxes <sup>a</sup>                          | 7.47                               | 3.76      | 1–15   | 11.06                                  | 3.62      | 4–17   | 2.71     | 29        | .006     | .056                 | 0.97        |
| Digit and Letter Span <sup>a</sup>          | 7.19                               | 3.12      | 1–14   | 9.76                                   | 2.33      | 5–14   | 2.70     | 31        | .006     | .056                 | 0.94        |
| Mixed Digit and Letter Span <sup>a</sup>    | 7.15                               | 2.61      | 2–10   | 9.81                                   | 3.71      | 1–16   | 2.18     | 27        | .019     | .115                 | 0.81        |
| Shape Memory <sup>a</sup>                   | 7.38                               | 3.44      | 1–13   | 10.29                                  | 2.52      | 5–16   | 2.79     | 31        | .004     | <b>.049</b>          | <b>0.97</b> |
| Rotated Shape Memory <sup>a</sup>           | 7.29                               | 2.52      | 2–11   | 10.06                                  | 1.73      | 6–12   | 3.55     | 28        | < .001   | <b>.019</b>          | <b>1.30</b> |
| Matrices: Completion <sup>a</sup>           | 7.44                               | 3.81      | 3–18   | 10.71                                  | 3.20      | 4–17   | 2.67     | 31        | .012     | .092                 | 0.93        |
| Matrices: Odd One Out <sup>a</sup>          | 8.20                               | 3.78      | 2–16   | 9.56                                   | 2.73      | 5–15   | 1.16     | 29        | .257     | .257                 | 0.42        |
| Naming Categories <sup>a</sup>              | 7.75                               | 3.38      | 1–16   | 10.65                                  | 3.79      | 2–18   | 2.31     | 31        | .014     | .096                 | 0.81        |
| Naming Opposites <sup>a</sup>               | 7.73                               | 3.56      | 1–13   | 11.00                                  | 2.07      | 6–14   | 3.15     | 29        | .002     | <b>.034</b>          | <b>1.13</b> |
| Story Recall <sup>a</sup>                   | 7.15                               | 3.30      | 1–12   | 10.53                                  | 2.60      | 4–16   | 3.28     | 31        | .001     | <b>.029</b>          | <b>1.14</b> |
| Picture Recall <sup>a</sup>                 | 8.57                               | 2.59      | 4–14   | 9.31                                   | 2.94      | 5–14   | 0.73     | 28        | .236     | .257                 | 0.27        |

| Variable                                         | Autistic children<br><i>n</i> = 17 |           |       | Non-autistic children<br><i>n</i> = 17 |           |       | <i>t</i> | <i>df</i> | <i>p</i> | <i>p<sub>H</sub></i> | <i>d</i>    |
|--------------------------------------------------|------------------------------------|-----------|-------|----------------------------------------|-----------|-------|----------|-----------|----------|----------------------|-------------|
|                                                  | <i>M</i>                           | <i>SD</i> | Range | <i>M</i>                               | <i>SD</i> | Range |          |           |          |                      |             |
| Executive functions composite score <sup>b</sup> | 7.38                               | 1.66      | 4–9   | 10.12                                  | 2.35      | 6–15  | 2.93     | 21        | .004     | <b>.047</b>          | <b>1.28</b> |
| Listing Words <sup>c</sup>                       | 7.00                               | 2.28      | 4–11  | 10.14                                  | 3.25      | 5–16  | 2.72     | 23        | .006     | .058                 | 1.09        |
| Divided Attention <sup>b</sup>                   | 7.06                               | 2.01      | 4–10  | 10.13                                  | 2.93      | 5–14  | 2.77     | 22        | .006     | .055                 | 1.17        |
| Animal Colors <sup>c</sup>                       | 6.30                               | 3.33      | 1–12  | 8.80                                   | 3.80      | 3–15  | 1.69     | 23        | .052     | .210                 | 0.69        |
| Drawing Routes <sup>b</sup>                      | 9.00                               | 2.97      | 5–14  | 11.11                                  | 1.86      | 7–14  | 2.17     | 23        | .020     | .115                 | 0.88        |

*Note.* Samples were matched for age, sex, and maternal education (as a proxy for socioeconomic status). *p<sub>H</sub>* indicates *p* values adjusted with Hommel's (1988) correction. Significant results after accounting for multiple testing (Hommel correction) are presented in bold.



| Variable                                                           | Autistic children<br><i>n</i> = 17 |           |       | Non-autistic children<br><i>n</i> = 17 |           |       | <i>t</i> | <i>df</i> | <i>p</i> | <i>p<sub>H</sub></i> | <i>d</i>    |
|--------------------------------------------------------------------|------------------------------------|-----------|-------|----------------------------------------|-----------|-------|----------|-----------|----------|----------------------|-------------|
|                                                                    | <i>M</i>                           | <i>SD</i> | Range | <i>M</i>                               | <i>SD</i> | Range |          |           |          |                      |             |
| Achievement Motivation <sup>a</sup>                                | -                                  | -         | -     | -                                      | -         | -     | -        | -         | -        | -                    | -           |
| Participation during testing, intelligence <sup>a</sup>            | 6.69                               | 2.52      | 2–10  | 10.12                                  | 4.27      | 1–16  | 2.79     | 31        | .005     | .050                 | 0.97        |
| Participation during testing, executive functions <sup>a</sup>     | 8.09                               | 1.30      | 7–10  | 10.43                                  | 3.44      | 7–16  | 2.13     | 23        | .022     | .115                 | 0.86        |
| Participation during testing, developmental functions <sup>a</sup> | 6.59                               | 2.98      | 1–10  | 10.57                                  | 3.59      | 5–16  | 3.38     | 29        | .001     | <b>.025</b>          | <b>1.22</b> |

*Note.* Samples were matched for age, sex, and maternal education (as a proxy for socioeconomic status). *p<sub>H</sub>* indicates *p* values adjusted with Hommel's (1988) correction. Significant results after accounting for multiple testing (Hommel correction) are presented in bold. Conscientiousness and Achievement Motivation only for ages 11 to 20 years.



**Table S5**

*Means, Standard Deviations, and t tests of the Cognitive Functions From the Intelligence and Development Scales–2 for Autistic and Non-Autistic Adolescents (Aged 11-20 Years)*

| Variable                                    | Autistic adolescents<br><i>n</i> = 26 |           |        | Non-autistic adolescents<br><i>n</i> = 26 |           |        | <i>t</i> | <i>df</i> | <i>p</i> | <i>p<sub>H</sub></i> | <i>d</i> |
|---------------------------------------------|---------------------------------------|-----------|--------|-------------------------------------------|-----------|--------|----------|-----------|----------|----------------------|----------|
|                                             | <i>M</i>                              | <i>SD</i> | Range  | <i>M</i>                                  | <i>SD</i> | Range  |          |           |          |                      |          |
| Profile IQ <sup>b</sup>                     | 96.64                                 | 16.91     | 55–131 | 95.81                                     | 13.91     | 61–121 | -0.19    | 49        | .576     | .926                 | 0.05     |
| Full-Scale IQ <sup>b</sup>                  | 98.80                                 | 17.60     | 55–129 | 96.31                                     | 12.75     | 63–116 | -0.58    | 49        | .718     | .926                 | 0.16     |
| Screening IQ <sup>b</sup>                   | 100.20                                | 17.10     | 55–125 | 99.92                                     | 16.68     | 61–125 | -0.06    | 49        | .523     | .926                 | 0.02     |
| Visual Processing <sup>b</sup>              | 103.92                                | 13.93     | 77–123 | 102.69                                    | 13.22     | 84–129 | -0.33    | 50        | .745     | .926                 | 0.09     |
| Processing Speed <sup>b</sup>               | 102.80                                | 16.88     | 70–143 | 99.31                                     | 13.29     | 73–126 | -0.82    | 49        | .793     | .926                 | 0.23     |
| Auditory Short-Term Memory <sup>b</sup>     | 95.58                                 | 17.01     | 55–139 | 98.81                                     | 10.84     | 74–121 | 0.82     | 50        | .209     | .926                 | 0.23     |
| Visuospatial Short-Term Memory <sup>b</sup> | 93.00                                 | 13.24     | 64–118 | 95.08                                     | 10.41     | 78–118 | 0.62     | 49        | .268     | .926                 | 0.17     |
| Abstract Reasoning <sup>b</sup>             | 101.28                                | 17.85     | 59–137 | 96.81                                     | 15.82     | 63–122 | -0.95    | 49        | .348     | .926                 | 0.27     |
| Verbal Reasoning <sup>b</sup>               | 99.69                                 | 18.35     | 58–126 | 98.27                                     | 16.05     | 61–128 | -0.30    | 50        | .616     | .926                 | 0.08     |
| Long-Term Memory <sup>b</sup>               | 89.52                                 | 15.71     | 55–113 | 91.19                                     | 17.08     | 58–137 | 0.36     | 49        | .359     | .926                 | 0.10     |
| Shape Design <sup>a</sup>                   | 11.23                                 | 2.60      | 7–16   | 10.77                                     | 2.57      | 7–16   | -0.64    | 50        | .522     | .926                 | 0.18     |
| Washer Design <sup>a</sup>                  | 10.38                                 | 3.05      | 4–17   | 10.46                                     | 2.87      | 4–19   | 0.09     | 50        | .926     | .926                 | 0.03     |
| Parrots <sup>a</sup>                        | 10.80                                 | 3.63      | 4–19   | 9.92                                      | 2.42      | 6–17   | -1.02    | 49        | .844     | .926                 | 0.29     |
| Boxes <sup>a</sup>                          | 10.36                                 | 2.46      | 5–16   | 10.00                                     | 3.20      | 2–15   | -0.45    | 49        | .672     | .926                 | 0.13     |
| Digit and Letter Span <sup>a</sup>          | 10.15                                 | 3.57      | 1–18   | 10.08                                     | 2.10      | 5–14   | -0.09    | 50        | .538     | .926                 | 0.03     |
| Mixed Digit and Letter Span <sup>a</sup>    | 9.15                                  | 3.29      | 1–18   | 10.46                                     | 2.50      | 6–17   | 1.61     | 50        | .057     | .926                 | 0.45     |
| Shape Memory <sup>a</sup>                   | 9.08                                  | 2.52      | 4–14   | 8.62                                      | 2.04      | 5–13   | -0.73    | 49        | .764     | .926                 | 0.20     |
| Rotated Shape Memory <sup>a</sup>           | 8.96                                  | 3.21      | 3–17   | 10.15                                     | 3.09      | 6–18   | 1.35     | 49        | .091     | .926                 | 0.38     |
| Matrices: Completion <sup>a</sup>           | 10.52                                 | 3.00      | 4–16   | 10.69                                     | 3.04      | 4–16   | 0.20     | 49        | .840     | .926                 | 0.06     |
| Matrices: Odd One Out <sup>a</sup>          | 10.64                                 | 3.62      | 3–18   | 8.88                                      | 3.06      | 2–14   | -1.87    | 49        | .067     | .926                 | 0.52     |
| Naming Categories <sup>a</sup>              | 10.38                                 | 3.95      | 1–16   | 10.12                                     | 3.34      | 4–16   | -0.27    | 50        | .604     | .926                 | 0.07     |
| Naming Opposites <sup>a</sup>               | 10.38                                 | 3.11      | 4–16   | 10.19                                     | 3.31      | 3–19   | -0.22    | 50        | .585     | .926                 | 0.06     |
| Story Recall <sup>a</sup>                   | 9.20                                  | 3.55      | 1–14   | 8.69                                      | 3.34      | 1–15   | -0.53    | 49        | .699     | .926                 | 0.15     |
| Picture Recall <sup>a</sup>                 | 7.77                                  | 2.80      | 3–13   | 8.65                                      | 3.57      | 3–18   | 0.99     | 50        | .162     | .926                 | 0.28     |

| Variable                                         | Autistic adolescents<br><i>n</i> = 26 |           |       | Non-autistic adolescents<br><i>n</i> = 26 |           |       | <i>t</i> | <i>df</i> | <i>p</i> | <i>p<sub>H</sub></i> | <i>d</i> |
|--------------------------------------------------|---------------------------------------|-----------|-------|-------------------------------------------|-----------|-------|----------|-----------|----------|----------------------|----------|
|                                                  | <i>M</i>                              | <i>SD</i> | Range | <i>M</i>                                  | <i>SD</i> | Range |          |           |          |                      |          |
| Executive functions composite score <sup>b</sup> | 9.31                                  | 2.17      | 6–13  | 9.84                                      | 1.76      | 6–14  | 0.96     | 48        | .171     | .926                 | 0.27     |
| Listing Words <sup>c</sup>                       | 8.27                                  | 3.39      | 1–14  | 9.21                                      | 2.73      | 4–17  | 1.07     | 48        | .144     | .926                 | 0.30     |
| Divided Attention <sup>b</sup>                   | 9.40                                  | 3.00      | 4–15  | 10.10                                     | 2.30      | 7–17  | 0.93     | 47        | .180     | .926                 | 0.26     |
| Animal Colors <sup>c</sup>                       | 8.83                                  | 3.43      | 2–14  | 9.88                                      | 3.22      | 6–19  | 1.10     | 47        | .138     | .926                 | 0.31     |
| Drawing Routes <sup>b</sup>                      | 10.29                                 | 2.39      | 5–15  | 10.02                                     | 2.63      | 5–15  | -0.38    | 49        | .648     | .926                 | 0.11     |

*Note.* Samples were matched for age, sex, and maternal education (as a proxy for socioeconomic status). *p<sub>H</sub>* indicates *p* values adjusted with Hommel's (1988) correction. Please note that after this correction, none of the comparisons were significant.

**Table S6**

*Means, Standard Deviations, and t tests of the Developmental Functions From the Intelligence and Development Scales–2 for Autistic and Non-Autistic Adolescents (Aged 11-20 Years)*

| Variable                                             | Autistic adolescents<br><i>n</i> = 26 |           |       | Non-autistic adolescents<br><i>n</i> = 26 |           |       | <i>t</i> | <i>df</i> | <i>p</i> | <i>p<sub>H</sub></i> | <i>d</i> |
|------------------------------------------------------|---------------------------------------|-----------|-------|-------------------------------------------|-----------|-------|----------|-----------|----------|----------------------|----------|
|                                                      | <i>M</i>                              | <i>SD</i> | Range | <i>M</i>                                  | <i>SD</i> | Range |          |           |          |                      |          |
| Psychomotor skills composite score <sup>b</sup>      | 9.12                                  | 1.87      | 4–12  | 10.29                                     | 1.58      | 7–15  | 2.42     | 49        | .010     | .456                 | 0.68     |
| Gross Motor Skills <sup>a</sup>                      | -                                     | -         | -     | -                                         | -         | -     | -        | -         | -        | -                    | -        |
| Fine Motor Skills <sup>b</sup>                       | 8.90                                  | 3.01      | 2–14  | 10.65                                     | 2.19      | 8–16  | 2.31     | 47        | .013     | .567                 | 0.66     |
| Visuomotor Skills <sup>b</sup>                       | 9.35                                  | 1.55      | 6–13  | 10.02                                     | 1.74      | 7–13  | 1.46     | 49        | .075     | .926                 | 0.41     |
| Social-emotional skills composite score <sup>b</sup> | 8.74                                  | 2.72      | 1–13  | 9.24                                      | 2.10      | 5–13  | 0.73     | 48        | .235     | .926                 | 0.21     |
| Identifying Emotions <sup>c</sup>                    | -                                     | -         | -     | -                                         | -         | -     | -        | -         | -        | -                    | -        |
| Regulating Emotions <sup>c</sup>                     | 9.00                                  | 3.16      | 1–13  | 9.36                                      | 2.53      | 4–13  | 0.44     | 48        | .329     | .926                 | 0.13     |
| Socially Competent Behavior <sup>c</sup>             | 8.65                                  | 3.16      | 2–15  | 9.12                                      | 2.37      | 5–14  | 0.58     | 46        | .281     | .926                 | 0.17     |
| Basic skills composite score <sup>b</sup>            | 10.77                                 | 1.78      | 8–14  | 9.93                                      | 2.16      | 5–13  | -1.49    | 48        | .142     | .926                 | 0.42     |
| Logical-Mathematical Reasoning <sup>a</sup>          | 10.96                                 | 3.61      | 1–17  | 10.52                                     | 2.90      | 4–16  | -0.48    | 49        | .633     | .926                 | 0.13     |
| Language Skills <sup>b</sup>                         | -                                     | -         | -     | -                                         | -         | -     | -        | -         | -        | -                    | -        |
| Phoneme Analysis <sup>a</sup>                        | -                                     | -         | -     | -                                         | -         | -     | -        | -         | -        | -                    | -        |
| Phoneme–Grapheme Correspondence <sup>a</sup>         | -                                     | -         | -     | -                                         | -         | -     | -        | -         | -        | -                    | -        |
| Language Expressive <sup>a</sup>                     | -                                     | -         | -     | -                                         | -         | -     | -        | -         | -        | -                    | -        |
| Language Receptive <sup>a</sup>                      | -                                     | -         | -     | -                                         | -         | -     | -        | -         | -        | -                    | -        |
| Reading <sup>b</sup>                                 | 10.40                                 | 1.84      | 8–15  | 9.58                                      | 2.19      | 5–13  | -1.41    | 46        | .167     | .926                 | 0.41     |
| Reading Words <sup>c</sup>                           | 10.67                                 | 2.76      | 5–16  | 8.96                                      | 2.41      | 5–13  | -2.31    | 47        | .025     | .893                 | 0.66     |
| Reading Pseudo Words <sup>c</sup>                    | 10.09                                 | 2.29      | 6–14  | 9.72                                      | 2.51      | 4–14  | -0.53    | 46        | .601     | .926                 | 0.15     |
| Text Comprehension <sup>a</sup>                      | 11.43                                 | 3.47      | 3–16  | 10.09                                     | 2.87      | 4–16  | -1.43    | 44        | .921     | .926                 | 0.42     |
| Spelling <sup>a</sup>                                | 9.95                                  | 2.80      | 6–15  | 9.75                                      | 2.67      | 4–14  | -0.25    | 43        | .806     | .926                 | 0.07     |

| Variable                                                           | Autistic adolescents<br><i>n</i> = 26 |           |       | Non-autistic adolescents<br><i>n</i> = 26 |           |       | <i>t</i> | <i>df</i> | <i>p</i> | <i>p<sub>H</sub></i> | <i>d</i> |
|--------------------------------------------------------------------|---------------------------------------|-----------|-------|-------------------------------------------|-----------|-------|----------|-----------|----------|----------------------|----------|
|                                                                    | <i>M</i>                              | <i>SD</i> | Range | <i>M</i>                                  | <i>SD</i> | Range |          |           |          |                      |          |
| Motivation and attitude composite score <sup>b</sup>               | 10.56                                 | 3.24      | 6–17  | 10.65                                     | 2.78      | 6–19  | 0.11     | 46        | .458     | .926                 | 0.03     |
| Conscientiousness <sup>a</sup>                                     | 10.21                                 | 3.27      | 6–18  | 10.26                                     | 2.85      | 6–19  | 0.06     | 45        | .477     | .926                 | 0.02     |
| Achievement Motivation <sup>a</sup>                                | 11.12                                 | 3.96      | 4–19  | 11.04                                     | 3.11      | 6–19  | -0.07    | 47        | .528     | .926                 | 0.02     |
| Participation during testing, intelligence <sup>a</sup>            | 9.12                                  | 3.18      | 1–16  | 10.21                                     | 3.08      | 4–15  | 1.23     | 48        | .112     | .926                 | 0.35     |
| Participation during testing, executive functions <sup>a</sup>     | 9.04                                  | 3.16      | 1–16  | 10.00                                     | 2.56      | 4–14  | 1.14     | 46        | .129     | .926                 | 0.33     |
| Participation during testing, developmental functions <sup>a</sup> | 9.46                                  | 3.06      | 1–16  | 10.71                                     | 2.71      | 5–16  | 1.52     | 48        | .068     | .926                 | 0.43     |

*Note.* Samples were matched for age, sex, and maternal education (as a proxy for socioeconomic status). *p<sub>H</sub>* indicates *p* values adjusted with Hommel's (1988) correction. Please note that after this correction, none of the comparisons were significant. Gross Motor Skills, Identifying Emotions, and Language Skills only for ages 5 to 10 years.
